# Supplementary material for: Co-N 2 P 2 Single-Atom Catalysts Enable Efficient α-Alkylation of Aromatic Ketones
Source: Royal Society of Chemistry journal article supplement (doi:10.1039/d6cc00398b), 2026-01-01
Supplement: d6cc00398b1.pdf [file d6cc00398b1.pdf]

## Supplementary Information

### Co-N<sub>2</sub>P<sub>2</sub> Single-Atom Catalysts Enable Efficient $\alpha$ -Alkylation of Aromatic Ketones.

Natarajan Anbuselvan,<sup>a</sup> Selvam Sivaprakash,<sup>a</sup> Duraiarasan Sneha,<sup>a</sup> Biplab Ghosh,<sup>b,c</sup>  
Devarajan Suresh,<sup>\*a</sup> and Arlin Jose Amali.<sup>\*a</sup>

<sup>a</sup>Department of Chemistry, School of Chemical and Biotechnology, SASTRA Deemed University, Thanjavur, Tamil Nadu, 613 401, India.

<sup>b</sup>Beamline Development &Application Section, Bhabha Atomic Research Centre, Trombay, Mumbai, 400085, India.

<sup>c</sup>High Pressure & Synchrotron Radiation Physics Division, Bhabha Atomic Research Centre, Trombay, Mumbai, 400085, India

| S. No. | Contents                                                                                                                                                        | Page No. |
|--------|-----------------------------------------------------------------------------------------------------------------------------------------------------------------|----------|
| 1      | Additional Experimental methods                                                                                                                                 | S3       |
| 2      | Schematic representation of synthesis of Co single atom catalyst trapped on hierarchically porous carbon doped with P and N (Co-N <sub>2</sub> P <sub>2</sub> ) | S7       |
| 3      | FT-IR spectra of Co(PPh <sub>3</sub> ) <sub>2</sub> Cl <sub>2</sub> , N-CTP and Co-N <sub>2</sub> P <sub>2</sub>                                                | S8       |
| 4      | SEM images of N-CTP and Co-N <sub>2</sub> P <sub>2</sub>                                                                                                        | S8       |
| 5      | PXRD pattern of Co-N <sub>2</sub> P <sub>2</sub>                                                                                                                | S9       |
| 6      | ICP-AES result of Co-N <sub>2</sub> P <sub>2</sub>                                                                                                              | S9       |
| 7      | N <sub>2</sub> adsorption studies                                                                                                                               | S10      |
| 8      | XPS Spectra of Co-N <sub>2</sub> P <sub>2</sub>                                                                                                                 | S10      |
| 9      | K-edge fitting parameters                                                                                                                                       | S11      |
| 10     | Optimization for the $\alpha$ -alkylation reaction catalyzed by Co-N <sub>2</sub> P <sub>2</sub>                                                                | S12      |
| 11     | Comparison of catalytic activity of Co-N <sub>2</sub> P <sub>2</sub> with previously reported catalysts for $\alpha$ - alkylation                               | S13      |
| 12     | Evaluation of Green Chemistry Metrics                                                                                                                           | S14      |
| 13     | Mechanistic studies                                                                                                                                             | S15      |
| 14     | Proposed reaction mechanism for $\alpha$ - alkylation of acetophenone catalyzed by Co-N <sub>2</sub> P <sub>2</sub>                                             | S16      |
| 15     | Sheldon's test for Co-N <sub>2</sub> P <sub>2</sub> catalyzed $\alpha$ - alkylation of acetophenone                                                             | S17      |
| 16     | Acid leaching and KSCN poisoning experiment                                                                                                                     | S17      |
| 17     | Reusability of Co-N <sub>2</sub> P <sub>2</sub> catalyzed $\alpha$ - alkylation of acetophenone                                                                 | S17      |
| 18     | PXRD pattern of reused Co-N <sub>2</sub> P <sub>2</sub> catalyst                                                                                                | S18      |
| 19     | XPS Co 2p spectrum of reused Co-N <sub>2</sub> P <sub>2</sub> catalyst                                                                                          | S18      |
| 20     | GC chromatogram for Co-N <sub>2</sub> P <sub>2</sub> catalyzed $\alpha$ - alkylation of acetophenone                                                            | S19      |
| 21     | GC chromatogram for Co(PPh <sub>3</sub> ) <sub>2</sub> Cl <sub>2</sub> catalyzed $\alpha$ - alkylation of acetophenone                                          | S19      |
| 22     | References                                                                                                                                                      | S20      |

## Experimental Methods

### Materials and reagents

All the chemicals, reagents, and solvents were purchased from commercial suppliers (Sigma Aldrich, Merck, Hi-Media) and used without further purification.

### Characterization

The phase composition was investigated using a Powder X-ray diffractometer (XRD, Rigaku, Japan) instrument with  $K_{\beta}$  filter for Cu- $K_{\alpha}$  radiation at  $2\theta = 10^{\circ}$  -  $80^{\circ}$  and a scan speed of 5 min. High-resolution transmission electron microscope (HR-TEM) characterization was carried out with a Tecnai G<sup>2</sup> Spirit microscope operating at 200 kV. Inductively Coupled Plasma Atomic Emission Spectroscopy (ICP-AES) analysis was carried out by using SPECTRO (GmbH, Germany) Analytical Instruments at IIT Bombay. The surface analysis was determined by model K-alpha XPS (X-ray Photoelectron Spectrometer) manufactured by Thermo scientific (USA). Co XANES and XAFS spectra were carried out on Co-N<sub>2</sub>P<sub>2</sub> sample in fluorescence mode at BL-09 of Indus-2, Raja Ramanna Centre for Advanced Technology (RRCAT), Indore. The Co K-edge energy range were calibrated using Co foil at 7709 eV. For the analysis of the XAFS data, the energy-dependent absorption coefficient  $\mu(E)$  has been converted to the energy-dependent absorption function  $\chi(E)$  and then to the wave number-dependent absorption coefficient  $\chi(k)$ . Finally,  $k^3$  weighted  $\chi(k)$  spectra were Fourier transformed in R space to generate the  $\chi(R)$  versus R spectra regarding the accurate distance from the center of the absorbing atoms. The XANES and XAFS data were analyzed using the FEFF 6.0 code 1 with the help of the Demeter software program. The interatomic distances and number of atoms were calculated by normalizing the backscattering amplitude and phase functions from FEFF to fit the EXAFS data. EXAFS data best fit were obtained to minimize Rfactor in the above process.

### **Preparation of porous carbon from rice husk**

The rice husk was activation carried out by previously reported literature. The first step, Rice husk (5.0 g) and  $\text{H}_3\text{PO}_4$  (10.0 g) was taken in a beaker and stirred at 12h at room temperature. Then it dried at 100 °C for 24 h. Resultant material subjected to pyrolysis at 550 °C (5 °C/min) for 1 h under  $\text{N}_2$  atmosphere. After that, the sample was washed with deionized water until reach the neutral pH, and the  $\text{H}_3\text{PO}_4$ -activated carbon samples were labeled as AC. In second step, AC (1.0 g) and  $\text{K}_2\text{C}_2\text{O}_4$  (3.0 g) at 1:3 mass ratio grounded into fine powder. Then it was pyrolyzed at 800 °C for 1 hour under  $\text{N}_2$  atmosphere. The temperature was cooled down to room temperature and washed with water to afford porous carbon (PC).

### **Synthesis of Covalent Triazine Polymer (CTP)**

In a typical method, cyanuric chloride (6.0 mmol, 1.25 g) and melamine (6.0 mmol, 0.76 g) were dissolved in 70 mL of acetonitrile, and stirred at room temperature for 6 h under  $\text{N}_2$  atmosphere. Then the solution was transferred into the teflon-lined stainless steel autoclave heated at 200 °C for 24 h and cooled down to room temperature. The dark red colour precipitate was separated by centrifugation, washed with excess acetonitrile, ethanol, and DI water three times, respectively, and then dried overnight in a vacuum oven at 100 °C.

### **Synthesis of $\text{Co}(\text{PPh}_3)_2\text{Cl}_2$ complex**

In a round-bottom flask,  $\text{CoCl}_2 \cdot 6\text{H}_2\text{O}$  (1.0 mmol) was dissolved in isopropanol (5 mL), and a solution of triphenylphosphine (2.0 mmol) in  $\text{CH}_2\text{Cl}_2$  (5 mL) was added dropwise under stirring. The reaction mixture was refluxed for 4 h. The solid product was collected by filtration, washed with 10% ethyl acetate in hexane, and dried under vacuum to afford the  $\text{Co}(\text{PPh}_3)_2\text{Cl}_2$  complex.

### **Synthesis of Co single atom catalyst trapped on hierarchically porous carbon doped with P and N ( $\text{Co-N}_2\text{P}_2$ )**

In a 100 mL round bottom flask, porous carbon (0.5 g) and N-CTP (0.5 g) were mixed in acetone (50 mL) to obtain a uniform dispersion. Subsequently,  $\text{CHCl}_3$  (5 mL) containing  $\text{Co}(\text{PPh}_3)_2\text{Cl}_2$  (r) added. The reaction mixture was stirred at room temperature for 24 h. The

resulting precipitate was filtered and washed with acetone and EtOH to remove unbound metal ions. Finally, the obtained solid was subjected to pyrolysis at 800 °C (5 °C min<sup>-1</sup>) under N<sub>2</sub> flow for 4 h to afford the Co-N<sub>2</sub>P<sub>2</sub>.

#### **General Procedure for $\alpha$ -Alkylation of the ketones with benzyl alcohol**

In a screw capped tube, aromatic ketone (0.5 mmol), benzyl alcohol (0.6 mmol), Co-N<sub>2</sub>P<sub>2</sub> (10 mg,  $4.04717 \times 10^{-7}$  mmol), KO<sup>t</sup>Bu (0.5 mmol), and toluene (1.0 mL) were added and the tube was sealed and heated at 100 °C for 12 h. After that, the tube was cooled down to room temperature, catalyst was separated by centrifugation and the solvent was evaporated under reduced pressure. The crude product was extracted with ethyl acetate twice. The organic layer dried over anhydrous sodium sulphate (Na<sub>2</sub>SO<sub>4</sub>), then the solvent was evaporated under reduced pressure. Finally, the product was purified by column chromatography using hexane/ethyl acetate as the eluent.

#### **Acid leaching test**

For acid treatment, the fresh catalyst (50 mg) was dispersed in 5 M HCl (25 mL) and stirred at room temperature for 12 h. The solid was washed with deionized water until the filtrate reached neutral pH (~7) and dried at 60 °C overnight. The acid-treated catalyst was subsequently employed for  $\alpha$ -alkylation of the ketones with benzyl alcohols under the standard reaction conditions.

#### **KSCN Poisoning test**

Co-N<sub>2</sub>P<sub>2</sub> (50 mg), KSCN (5.0 mmol) and water (5.0 mL) were added (5 mL) in a round-bottom flask and stirred at room temperature for 12 h. The resulting solid was filtered, washed thoroughly with deionized water, and dried in an oven at 60 °C overnight. The obtained material was subsequently employed for  $\alpha$ -alkylation of the ketones with benzyl alcohols under the standard reaction conditions.

### **Gram scale synthesis of 1,3-diphenylpropan-1-one catalyzed by Co-N<sub>2</sub>P<sub>2</sub>**

In a screw capped tube, acetophenone (1.0 g, 8.3 mmol), benzyl alcohol (0.89 g, 8.3 mmol), Co-N<sub>2</sub>P<sub>2</sub> catalyst (0.1 g,  $4.04717 \times 10^{-6}$  mol), KO<sup>t</sup>Bu (0.93 g, 8.3 mmol), and toluene (15 mL) were added and heated at 100 °C 12 h. After that, the tube was cooled down to room temperature, catalyst was separated by centrifugation and the solvent was evaporated under reduced pressure. The crude product was extracted with ethyl acetate twice. The organic layer dried over anhydrous sodium sulphate (Na<sub>2</sub>SO<sub>4</sub>), then the solvent was evaporated under reduced pressure. Finally, the product was purified by column chromatography using hexane/ethyl acetate as the eluent. Green chemistry metrics was determined (Table S5).

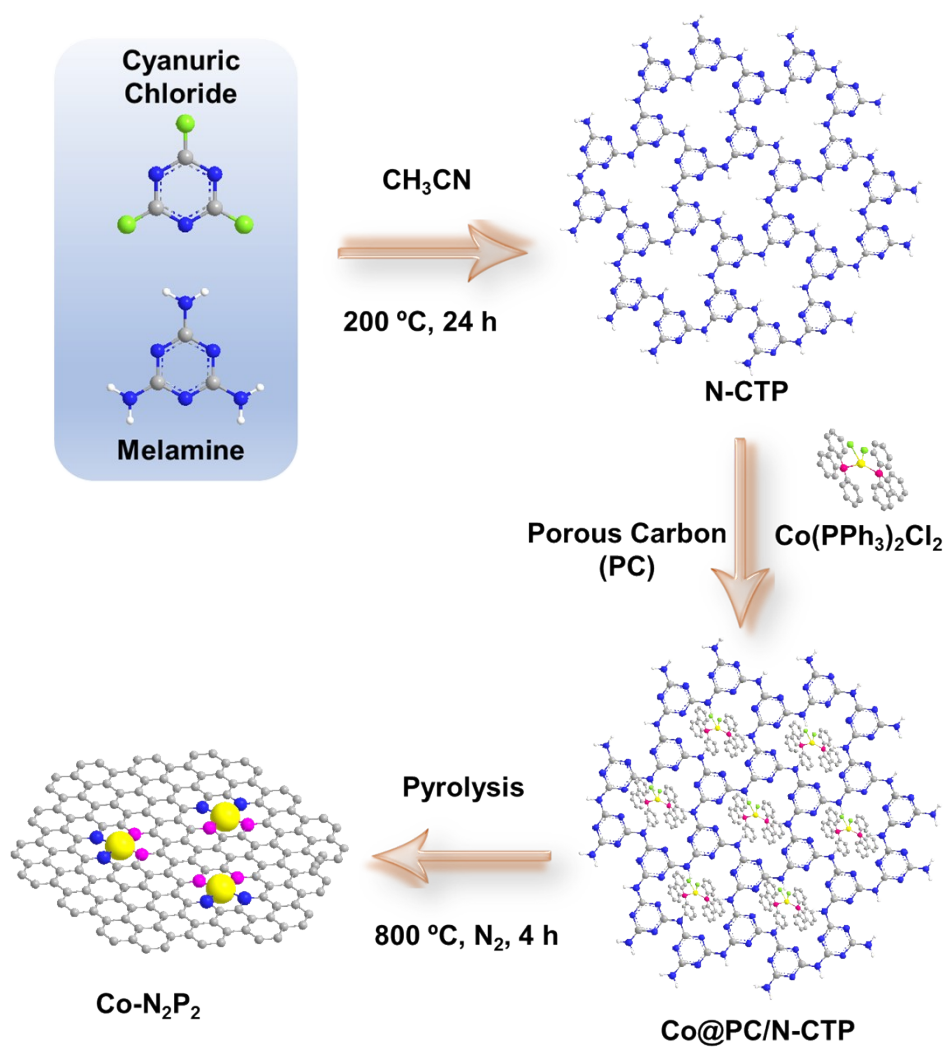

**Scheme S1.** Schematic representation of synthesis of Co single atom catalyst trapped on hierarchically porous carbon doped with P and N (Co-N<sub>2</sub>P<sub>2</sub>).

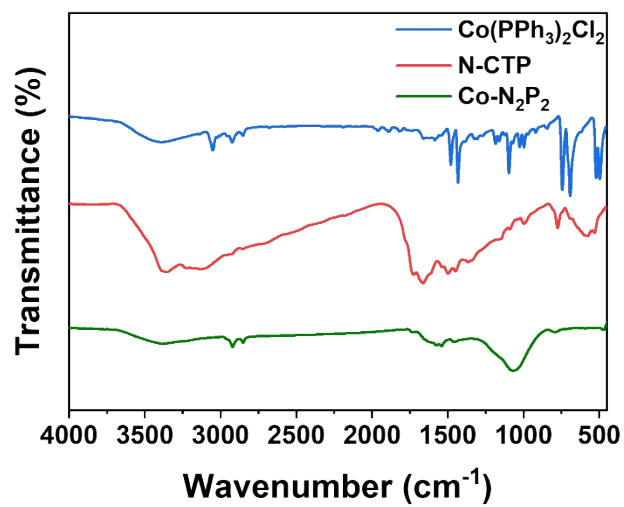

**Fig. S1.** FT-IR spectra of  $\text{Co}(\text{PPh}_3)_2\text{Cl}_2$ , N-CTP and  $\text{Co-N}_2\text{P}_2$

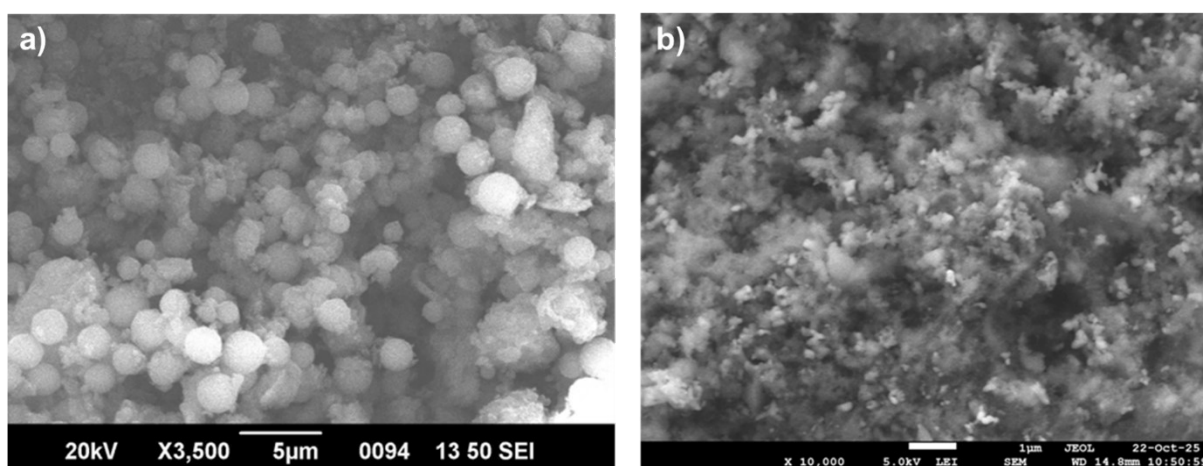

**Fig. S2.** SEM images of N-CTP (a) and  $\text{Co-N}_2\text{P}_2$  (b).



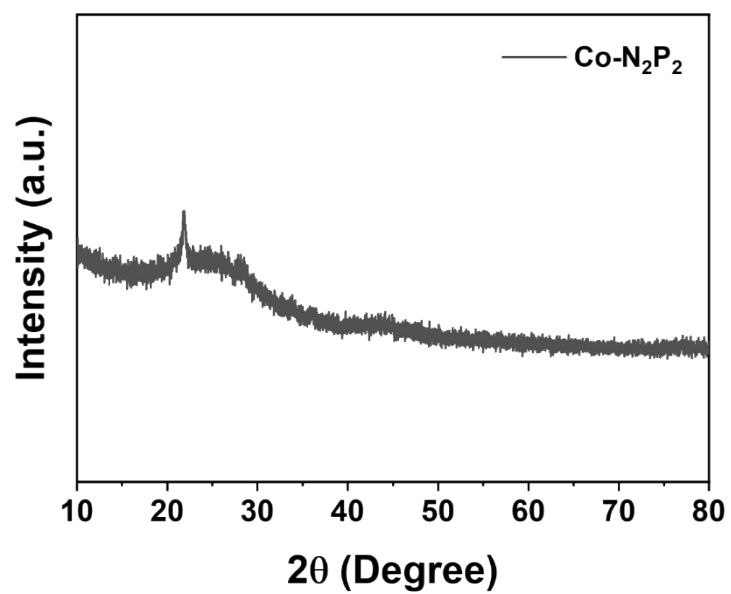

**Fig. S3.** PXRD pattern of Co-N<sub>2</sub>P<sub>2</sub>.

**Table S1.** ICP-AES result of Co-N<sub>2</sub>P<sub>2</sub>

| Sample                           | Co (ppm) |
|----------------------------------|----------|
| Co-N <sub>2</sub> P <sub>2</sub> | 2.385    |

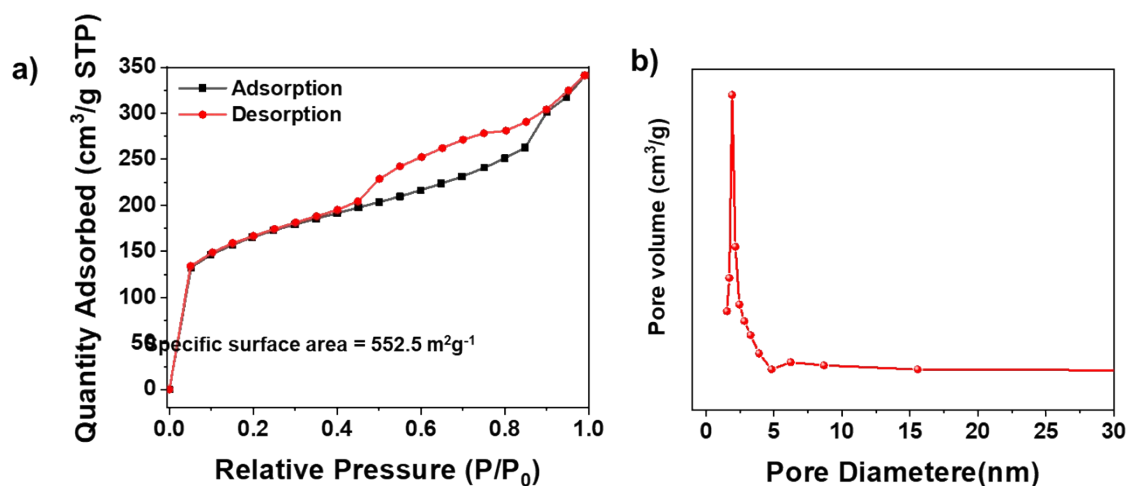

**Fig. S4.**  $N_2$  adsorption-desorption isotherm (a) and the corresponding pore size distribution plot (b) of  $Co-N_2P_2$ .

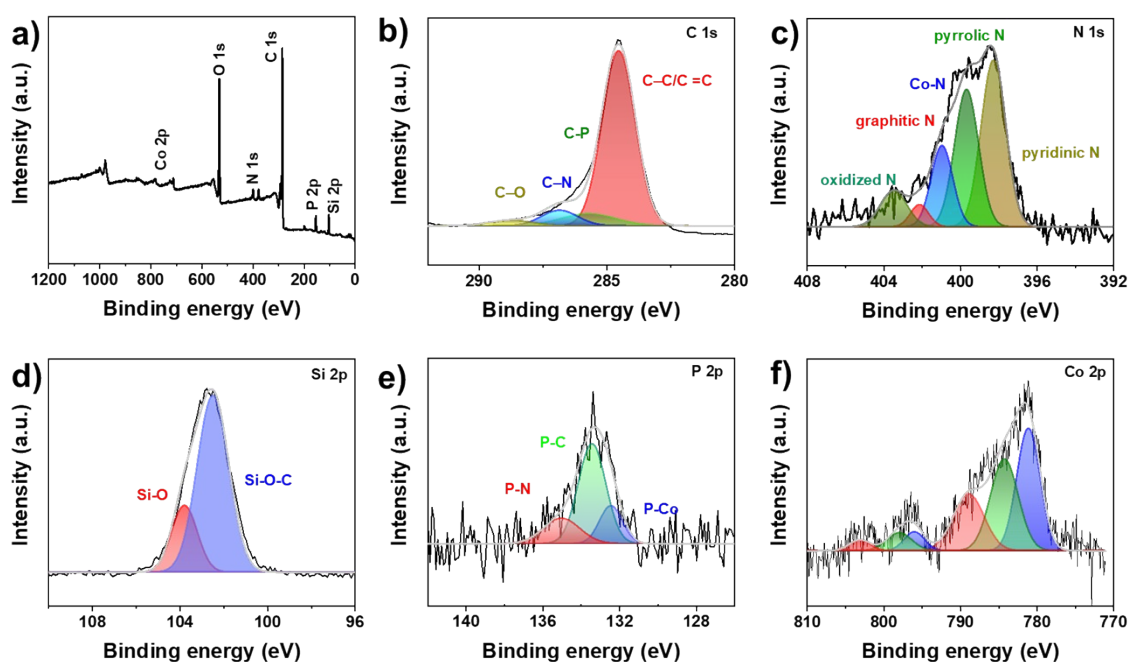

**Fig. S5.** XPS Spectra of  $Co-N_2P_2$  Survey spectrum (a) C 1s spectra (b) N 1s spectra (c) Si 2p spectra (d) P 2p spectra (e) and Co 2p spectra of  $Co-N_2P_2$

**Table S2.** K-edge fitting parameters

| S.No.                                                                                                                             | Sample                           | Path  | N    | R (Å) | Error (Å)  | $\sigma^2 \times 10^2$ (Å <sup>2</sup> ) | $\Delta E_0$ (eV) | R-factor |
|-----------------------------------------------------------------------------------------------------------------------------------|----------------------------------|-------|------|-------|------------|------------------------------------------|-------------------|----------|
| 1                                                                                                                                 | Co Foil                          | Co-Co | 12.0 | 2.489 | +/- 0.0028 | 0.006                                    | 6.352             | 0.002    |
| 2                                                                                                                                 | CoO                              | Co-O  | 6.0  | 2.094 | +/- 0.034  | 0.011                                    | -4.066            | 0.009    |
|                                                                                                                                   |                                  | Co-Co | 12.0 | 3.003 | +/- 0.013  | 0.009                                    | -4.066            | 0.009    |
| 3                                                                                                                                 | CoPc                             | Co-N  | 4.0  | 1.905 | +/- 0.009  | 0.003                                    | 3.02              | 0.015    |
|                                                                                                                                   |                                  | Co-C  | 4.0  | 2.909 | +/- 0.013  | 0.001                                    | 3.02              | 0.015    |
| 4                                                                                                                                 | Co-N <sub>2</sub> P <sub>2</sub> | Co-N  | 2    | 1.892 | +/- 0.0262 | 0.0012                                   | -7.633            | 0.018    |
|                                                                                                                                   |                                  | Co-P  | 2    | 2.298 | +/- 0.0267 | 0.0009                                   | -7.633            | 0.018    |
| N - coordination number, R - the internal atomic distance, $\sigma^2$ - Debye-Waller factor and $\Delta E_0$ - edge energy shift. |                                  |       |      |       |            |                                          |                   |          |

**Table S3.** Optimization for the  $\alpha$ -alkylation reaction catalyzed by Co-N<sub>2</sub>P<sub>2</sub>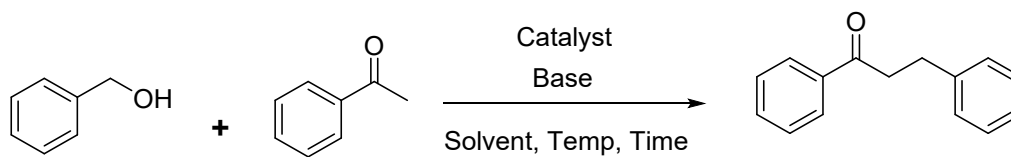

| S. No    | Catalyst                                           | Solvent          | Base                            | Temp (°C)  | Time (h)  | Yield (%) |
|----------|----------------------------------------------------|------------------|---------------------------------|------------|-----------|-----------|
| 1        | -                                                  | Toluene          | -                               | 100        | 12        | NR        |
| 2        | -                                                  | Toluene          | KO <sup>t</sup> Bu              | 100        | 12        | NR        |
| 3        | PC                                                 | Toluene          | KO <sup>t</sup> Bu              | 100        | 12        | NR        |
| 4        | Co(PPh <sub>3</sub> ) <sub>2</sub> Cl <sub>2</sub> | Toluene          | KO <sup>t</sup> Bu              | 100        | 12        | trace     |
| 5        | Co-N <sub>2</sub> P <sub>2</sub>                   | Toluene          | -                               | 100        | 12        | NR        |
| <b>6</b> | <b>Co-N<sub>2</sub>P<sub>2</sub></b>               | <b>Toluene</b>   | <b>KO<sup>t</sup>Bu</b>         | <b>100</b> | <b>12</b> | <b>90</b> |
| 7        | Co-N <sub>2</sub> P <sub>2</sub>                   | Xylene           | KO <sup>t</sup> Bu              | 100        | 12        | 80        |
| 8        | Co-N <sub>2</sub> P <sub>2</sub>                   | H <sub>2</sub> O | KO <sup>t</sup> Bu              | 100        | 12        | 50        |
| 9        | Co-N <sub>2</sub> P <sub>2</sub>                   | Dioxane          | KO <sup>t</sup> Bu              | 100        | 12        | 85        |
| 10       | Co-N <sub>2</sub> P <sub>2</sub>                   | Toluene          | KOH                             | 100        | 12        | 70        |
| 11       | Co-N <sub>2</sub> P <sub>2</sub>                   | Toluene          | NaOH                            | 100        | 12        | 64        |
| 12       | Co-N <sub>2</sub> P <sub>2</sub>                   | Toluene          | K <sub>2</sub> CO <sub>3</sub>  | 100        | 12        | trace     |
| 13       | Co-N <sub>2</sub> P <sub>2</sub>                   | Toluene          | Na <sub>2</sub> CO <sub>3</sub> | 100        | 12        | trace     |
| 14       | Co-N <sub>2</sub> P <sub>2</sub>                   | Toluene          | KO <sup>t</sup> Bu              | 80         | 12        | 54        |
| 15       | Co-N <sub>2</sub> P <sub>2</sub>                   | Toluene          | KO <sup>t</sup> Bu              | 120        | 12        | 92        |
| 16       | Co-N <sub>2</sub> P <sub>2</sub>                   | Toluene          | KO <sup>t</sup> Bu              | 100        | 18        | 90        |
| 17       | Co-N <sub>2</sub> P <sub>2</sub>                   | Toluene          | KO <sup>t</sup> Bu              | 100        | 24        | 92        |

**Table S4.** Comparison of catalytic activity of Co-N<sub>2</sub>P<sub>2</sub> with previously reported catalysts for  $\alpha$ -alkylation reactions

| S.No. | Catalyst                                            | Mol (%) | Base                           | Temp (°C) | Solvent  | Yield (%) | No. of runs | Ref       |
|-------|-----------------------------------------------------|---------|--------------------------------|-----------|----------|-----------|-------------|-----------|
| 1     | Pd/C                                                | 1       | K <sub>3</sub> PO <sub>4</sub> | 80        | toluene  | 100       | 4           | 1         |
| 2     | Ni/SiO <sub>2</sub> -Al <sub>2</sub> O <sub>3</sub> | 20      | K <sub>3</sub> PO <sub>4</sub> | 175       | ---      | 86        | 5           | 2         |
| 3     | CuO <sub>x</sub> -250                               | 71      | K <sub>3</sub> PO <sub>4</sub> | 170       | n-hexane | 90        | 5           | 3         |
| 4     | LCN@Zn-SAC                                          | 1.5     | KOH                            | 110       | toluene  | 92        | 8           | 4         |
| 5     | Nano-Fe <sub>2</sub> O <sub>3</sub>                 | 30      | KO <sup>t</sup> Bu             | 135       | toluene  | 97        | 5           | 5         |
| 6     | MnO <sub>2</sub> @PDCS                              | 1.5     | NaOH                           | 120       | toluene  | 89        | 6           | 6         |
| 7     | Mn-MgO/Al <sub>2</sub> O <sub>3</sub>               | 9.1     | -                              | 160       | toluene  | 95        | 4           | 7         |
| 8     | Mn@CeO <sub>2</sub>                                 | 10      | NaOH                           | 130       | toluene  | 98        | 6           | 8         |
| 9     | Co-N <sub>2</sub> P <sub>2</sub>                    | 0.8     | KO <sup>t</sup> Bu             | 100       | toluene  | 92        | 5           | This work |

**Table S5.** Evaluation of Green Chemistry Metrics.

|                  | Chemical                 | Weight (g)    | Mol. Weight |
|------------------|--------------------------|---------------|-------------|
| Reactant 1       | Acetophenone             | 1.000         | 120.15      |
| Reactant 2       | Benzyl alcohol           | 0.897         | 108.14      |
| Base             | KO <sup>t</sup> Bu       | 0.931         | 112.21      |
| Solvent          | toluene                  | 13.00 (15 mL) | 092.06      |
| Recycled solvent | toluene                  | 12.18         |             |
| Product          | 1,3-diphenylpropan-1-one | 1.46          | 210.28      |
| By product       | H <sub>2</sub> O         | 0.125         | 018.01      |

Product yield: (Isolated yield / theoretical yield) x 100 = 84%

- ✓ Product yield: 84%
- ✓ E factor =  $\{[(1 + 0.897 + 0.931 + 14 + 0.125) - (1.46 + 12.18)]/1.46\} = 2.269$  kg waste/  
1 kg product
- ✓ Atom economy =  $(210.28/228.29) \times 100 = 92.11\%$
- ✓ Atom efficiency =  $84 \times (92.11 / 100) = 77.34\%$
- ✓ Carbon efficiency =  $(15/15) \times 100 = 100\%$
- ✓ Reaction mass efficiency =  $(1.46/1.897) \times 100 = 83.90\%$

**Scheme S2.** Mechanistic studies

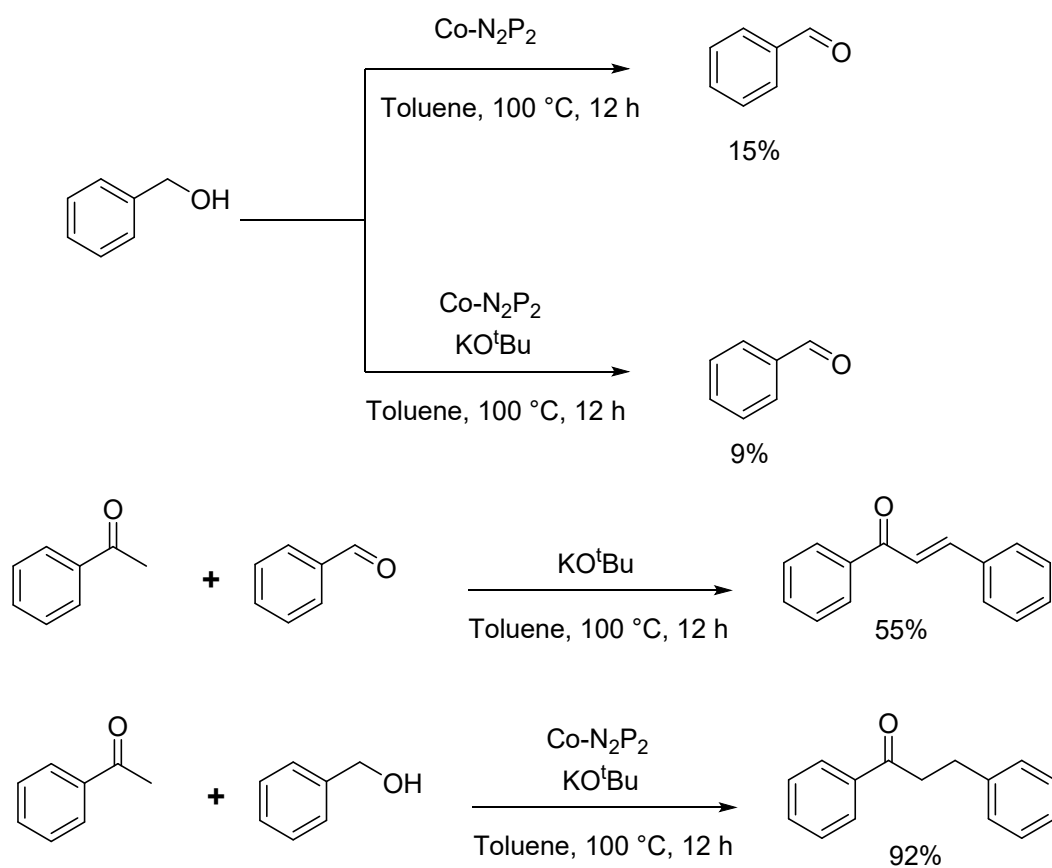

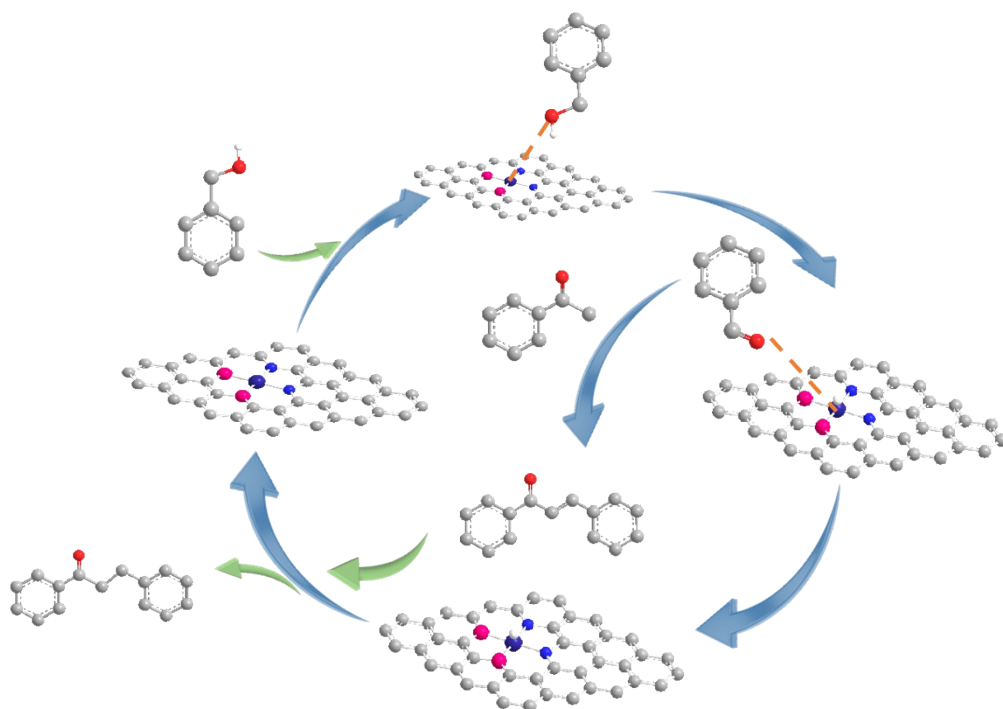

**Scheme S3.** Proposed reaction mechanism for  $\alpha$ - alkylation of acetophenone catalyzed by Co-N<sub>2</sub>P<sub>2</sub>



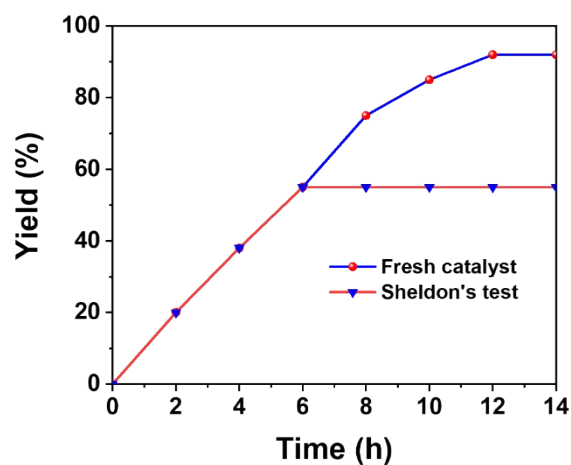

**Fig. S5.** Sheldon's test for Co-N<sub>2</sub>P<sub>2</sub> catalyzed  $\alpha$ - alkylation of acetophenone.

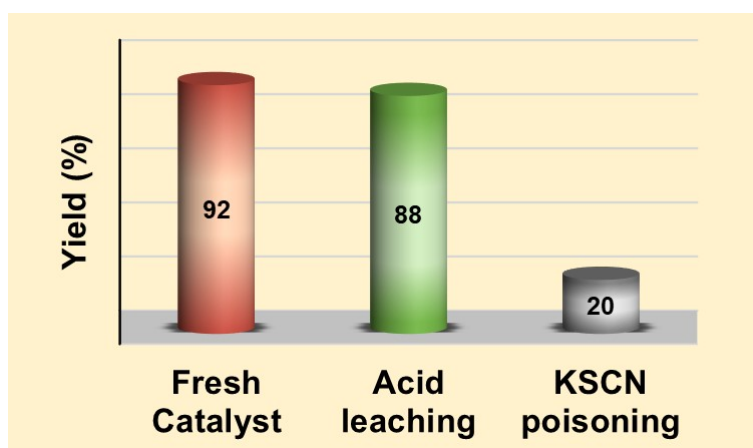

**Fig. S6.** Acid leaching and KSCN poisoning experiment

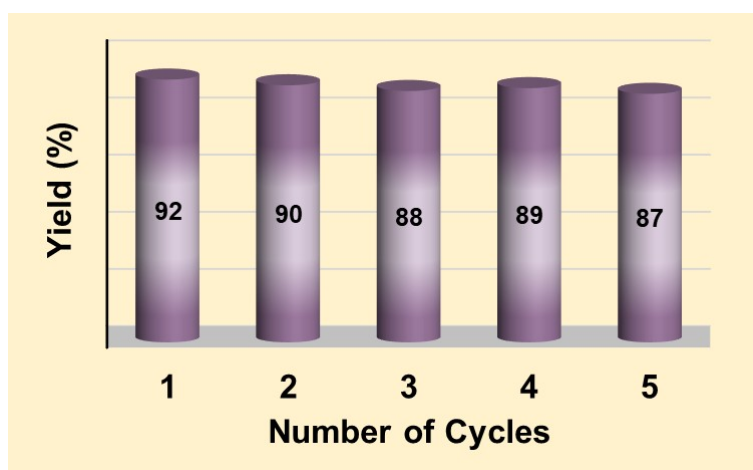

**Fig. S7.** Reusability of Co-N<sub>2</sub>P<sub>2</sub> catalyzed  $\alpha$ - alkylation of acetophenone.

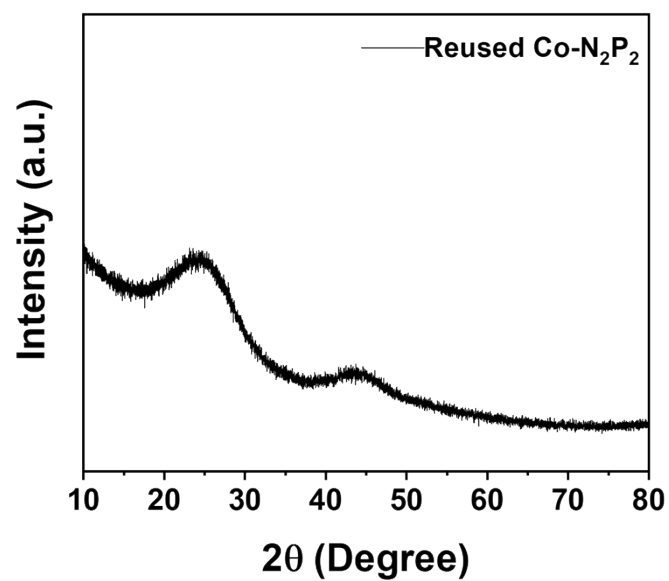

**Fig. S8.** PXRD pattern of reused  $\text{Co-N}_2\text{P}_2$  catalyst.

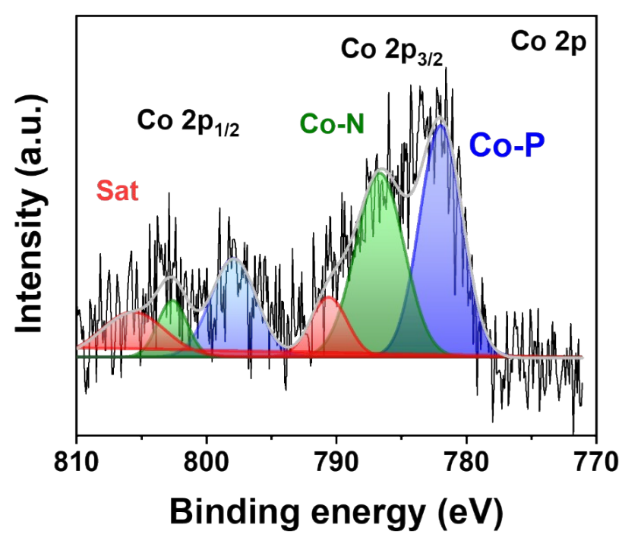

**Fig. S9.** Co 2p XPS spectrum of reused  $\text{Co-N}_2\text{P}_2$  catalyst.

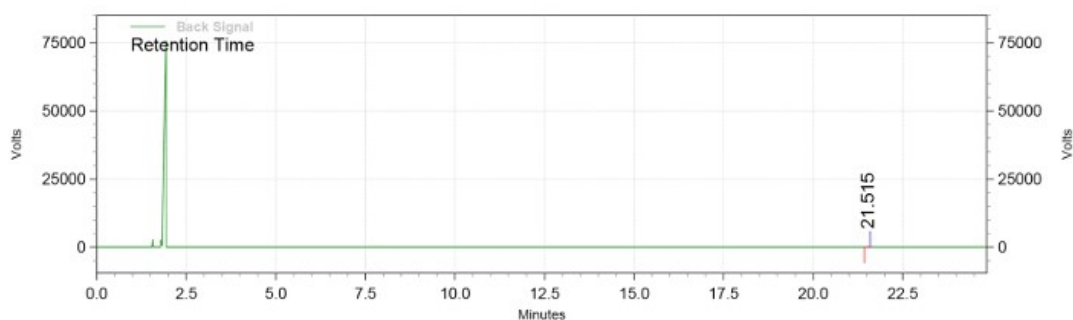

**Back Signal  
Results**

| Retention Time | Area    | Area % | Height  | Height % |
|----------------|---------|--------|---------|----------|
| 21.515         | 3425871 | 100.00 | 1258979 | 100.00   |
| Totals         | 3425871 | 100.00 | 1258979 | 100.00   |

**Fig. S10.** GC chromatogram for Co-N<sub>2</sub>P<sub>2</sub> catalyzed  $\alpha$ - alkylation of acetophenone

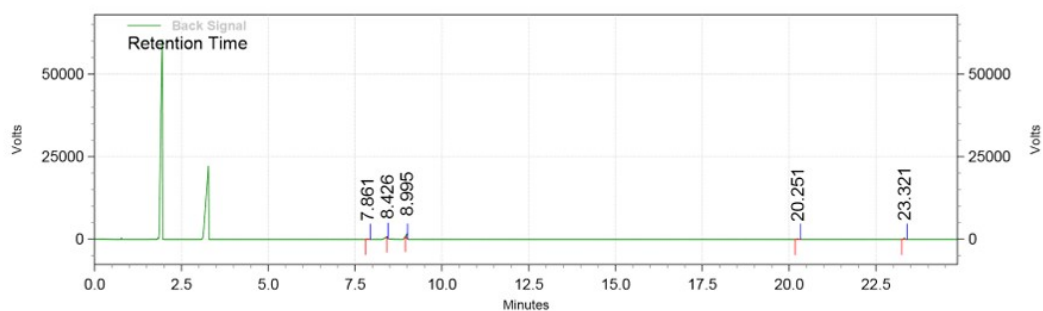

**Back Signal  
Results**

| Retention Time | Area     | Area % | Height   | Height % |
|----------------|----------|--------|----------|----------|
| 7.861          | 2511521  | 6.72   | 1092671  | 6.05     |
| 8.426          | 2515887  | 6.73   | 2084109  | 11.54    |
| 8.995          | 21801192 | 58.34  | 10762652 | 59.58    |
| 20.251         | 3075429  | 8.23   | 1120413  | 6.20     |
| 23.321         | 7464566  | 19.98  | 3005194  | 16.64    |
| Totals         | 37368595 | 100.00 | 18065039 | 100.00   |

**Fig. S10.** GC chromatogram for Co(PPh<sub>3</sub>)<sub>2</sub>Cl<sub>2</sub> catalyzed  $\alpha$ - alkylation of acetophenone

## References

1. N. R. Bennedsen, R. L. Mortensen, S. Kramer and S. Keghnæs, *J. Catal.*, 2019, **371**, 153–160.
2. A. Charvieux, J. B. Giorgi, N. Duguet and E. Métay, *Green Chem.*, 2018, **20**, 4210–4216.
3. D. Yang, H. Wang and C.-R. Chang, *Org. Biomol. Chem.*, 2024, **22**, 970–975.
4. X. Zhang, G.-P. Lu, K. Wang, Y. Lin, P. Wang and W. Yi, *Nano Res.*, 2022, **15**, 1874–1881.
5. M. Nallagangula, C. Sujatha, V. T. Bhat and K. Namitharan, *Chem. Commun.*, 2019, **55**, 8490–8493.
6. Y. Qiu, Y. Zhang, L. Jin, L. Pan, G. Du, D. Ye and D. Wang, *Org. Chem. Front.*, 2019, **6**, 3420–3427.
7. Y. Kita, M. Kuwabara, K. Kamata and M. Hara, *ACS Catal.*, 2022, **12**, 11767–11775.
8. R. Swaathy and S. Karthikeyan, *ACS Omega*, 2025, **10**, 9649–9660.
